# Supplementary material
Source: HighWire-hosted journal article supplement (http://thorax.bmjjournals.com/highwire/filestream/174489/field_highwire_adjunct_files/0/605367table.pdf)
Supplement: 605367table.pdf [file 605367table.pdf]

Online supplement: Internal validity of included studies

| Study                      | Prognostically homogenous study population | Concealment of random allocation | Prestratification (prognostically relevant variables) | Description of randomisation procedure | Registration of loss to follow-up | Registration of co-interventions for each group | Blinding of outcome assessors | Check success of blinding |
|----------------------------|--------------------------------------------|----------------------------------|-------------------------------------------------------|----------------------------------------|-----------------------------------|-------------------------------------------------|-------------------------------|---------------------------|
| Bernard <sup>1</sup>       | +/-                                        | -                                | -                                                     | +/-                                    | +                                 | -                                               | -                             | -                         |
| Casaburi <sup>2</sup>      | -                                          | -                                | -                                                     | -                                      | +/-                               | -                                               | -                             | -                         |
| Coppoolse <sup>3</sup>     | +                                          | -                                | -                                                     | +                                      | +                                 | -                                               | -                             | -                         |
| Martinez <sup>4</sup>      | -                                          | -                                | -                                                     | -                                      | +                                 | -                                               | -                             | -                         |
| Mador <sup>5</sup>         | +/-                                        | +/-                              | -                                                     | -                                      | +                                 | +/-                                             | -                             | -                         |
| Normandin <sup>6</sup>     | -                                          | -                                | -                                                     | -                                      | +                                 | -                                               | -                             | -                         |
| Ortega <sup>7</sup>        | +/-                                        | -                                | -                                                     | -                                      | -                                 | -                                               | -                             | -                         |
| Ries <sup>8</sup>          | -                                          | -                                | -                                                     | -                                      | +                                 | -                                               | -                             | -                         |
| Rooyackers <sup>9</sup>    | -                                          | -                                | -                                                     | -                                      | -                                 | -                                               | -                             | -                         |
| Sivori <sup>10</sup>       | +                                          | -                                | -                                                     | +/-                                    | +                                 | -                                               | -                             | -                         |
| Spruit <sup>11</sup>       | +/-                                        | +/-                              | -                                                     | -                                      | +                                 | -                                               | +                             | -                         |
| Vallet <sup>12</sup>       | +                                          | -                                | -                                                     | -                                      | +                                 | -                                               | -                             | -                         |
| Vogiatzis <sup>13</sup>    | +/-                                        | -                                | +                                                     | -                                      | +                                 | -                                               | -                             | -                         |
| Wurtemberger <sup>14</sup> | +                                          | -                                | -                                                     | -                                      | -                                 | -                                               | -                             | -                         |

+ Item properly addressed; +/- Item partially addressed; - Item not addressed.

Items “blinding of treatment providers” and “blinding of patients” rated as “not applicable” and therefore omitted from table.

<sup>1</sup> 14 of 18 trials were included in the quality assessment. 4 trials were only available as abstracts and provided little details on internal validity.

## Reference List

1. Bernard S, Whittom F, LeBlanc P, Jobin J, Belleau R, Berube C *et al.* Aerobic and strength training in patients with chronic obstructive pulmonary disease. *American Journal of Respiratory & Critical Care Medicine* 1999;**159**:896-901.
2. Casaburi R, Patessio A, Ioli F, Zanaboni S, Donner CF, Wasserman K. Reductions in exercise lactic acidosis and ventilation as a result of exercise training in patients with obstructive lung disease. *American Review of Respiratory Disease* 1991;**143**:9-18.
3. Coppoolse R, Schols AM, Baarends EM, Mostert R, Akkermans MA, Janssen PP *et al.* Interval versus continuous training in patients with severe COPD: a randomized clinical trial. *European Respiratory Journal* 1999;**14**:258-63.
4. Martinez FJ, Vogel PD, Dupont DN, Stanopoulos I, Gray A, Beamis JF. Supported arm exercise vs unsupported arm exercise in the rehabilitation of patients with severe chronic airflow obstruction. *Chest* 1993;**103**:1397-402.
5. Mador MJ, Bozkanat E, Aggarwal A, Shaffer M, Kufel TJ. Endurance and Strength Training in Patients With COPD *Chest* 2004;**125**:2036-45.
6. Normandin EA, McCusker C, Connors M, Vale F, Gerardi D, ZuWallack RL. An evaluation of two approaches to exercise conditioning in pulmonary rehabilitation. *Chest* 2002;**121**:1085-91.
7. Ortega F, Toral J, Cejudo P, Villagomez R, Sanchez H, Castillo J *et al.* Comparison of effects of strength and endurance training in patients with chronic obstructive pulmonary disease. *American Journal of Respiratory & Critical Care Medicine* 2002;**166**:669-74.
8. Ries AL, Ellis B, Hawkins RW. Upper extremity exercise training in chronic obstructive pulmonary disease. *Chest* 1988;**93**:688-92.

9. Rooyackers JM, Berkeljon DA, Folgering HT. Eccentric exercise training in patients with chronic obstructive pulmonary disease. *International Journal of Rehabilitation Research* 2003;**26**:47-9.
10. Sivori M, Rhodius E, Kaplan P, Talarico M, Gorojod G, Carreras B *et al.* [Exercise training in chronic obstructive pulmonary disease. Comparative study of aerobic training of lower limbs vs. combination with upper limbs]. [Spanish]. *Medicina* 1998;**58**:717-27.
11. Spruit MA, Gosselin R, Troosters T, De Paepe K, Decramer M. Resistance versus endurance training in patients with COPD and peripheral muscle weakness. *European Respiratory Journal* 2002;**19**:1072-8.
12. Vallet G, Ahmaidi S, Serres I, Fabre C, Bourgooin D, Desplan J *et al.* Comparison of two training programmes in chronic airway limitation patients: standardized versus individualized protocols. *European Respiratory Journal* 1997;**10**:114-22.
13. Vogiatzis I, Nanas S, Roussos C. Interval training as an alternative modality to continuous exercise in patients with COPD. *European Respiratory Journal* 2002;**20**:12-9.
14. Wurtemberger G, Bastian K. [Functional effects of different training in patients with COPD]. *Pneumologie* 2001;**55**:553-62.
